# Supplementary material
Source: ML conference proceedings conference paper supplement (https://proceedings.neurips.cc/paper_files/paper/2016/hash/6ea2ef7311b482724a9b7b0bc0dd85c6-Abstract.html)
Supplement: Supplementary file 2 [file 6ea2ef7311b482724a9b7b0bc0dd85c6-Supplemental.zip]

Archive with 2 entries (1 files):
- Appendix/
- Appendix/appendix.pdf
